# Supplementary material
Source: PubMed Central journal article supplement (PMC3513508)
Supplement: NIHMS401455-supplement-Supp_Figure_S1-S4.pdf [file NIHMS401455-supplement-Supp_Figure_S1-S4.pdf]

**A** Treg suppressive curves, raw data from 3 patients

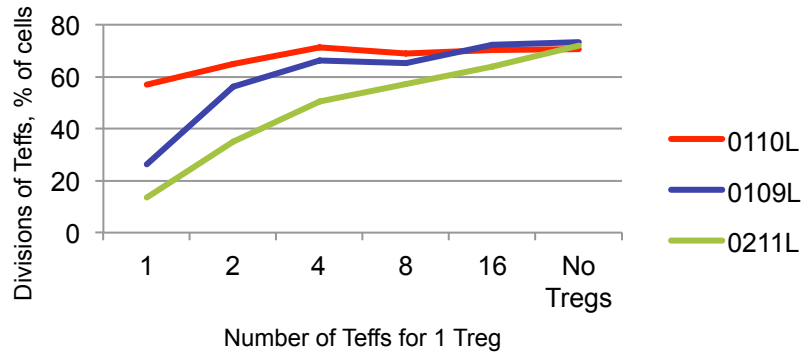

**B** Standardized suppression =  $\frac{(\% \text{ div. without Tregs} - \% \text{ div. at current ratio})}{\% \text{ of div. without Tregs}} \times 100$

An example of calculation for Tregs from patient 0211L

| N of Teffs for 1 Treg | Divisions of Teffs, % | Standardized suppression, % |
|-----------------------|-----------------------|-----------------------------|
| 1                     | 13.46                 | 81.28                       |
| 2                     | 35.05                 | 51.27                       |
| 4                     | 50.31                 | 30.05                       |
| 8                     | 57.32                 | 20.30                       |
| 16                    | 63.78                 | 11.32                       |
| No Tregs              | 71.92                 | 0                           |

**C** Standardized suppression curves, data from 3 patients

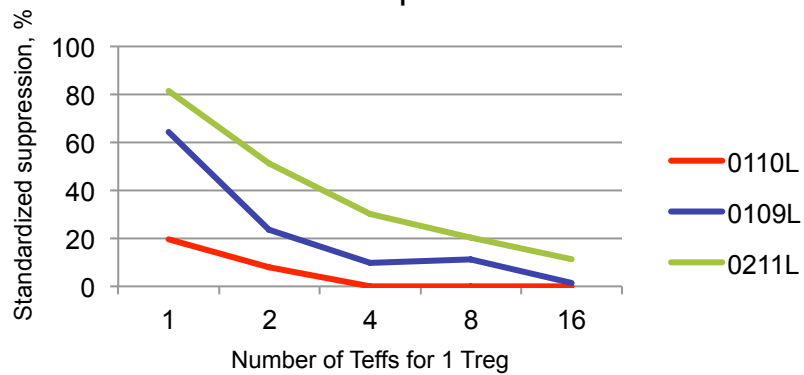

**D** Area under curve (AUC) for Tregs from 0211L patient

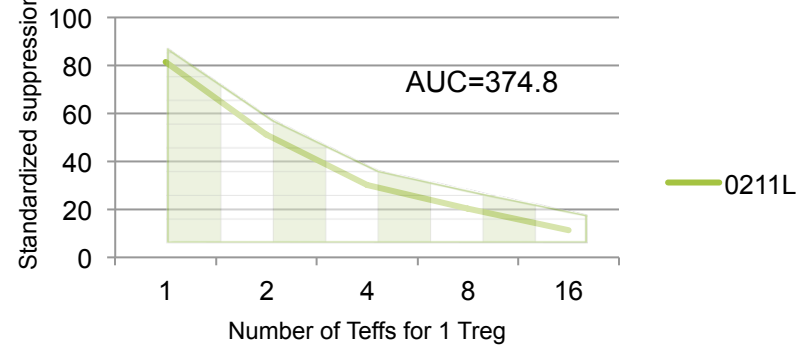

Figure S1

# Abnormal patterns of FOXP3 expression in Tregs of Tx recipients

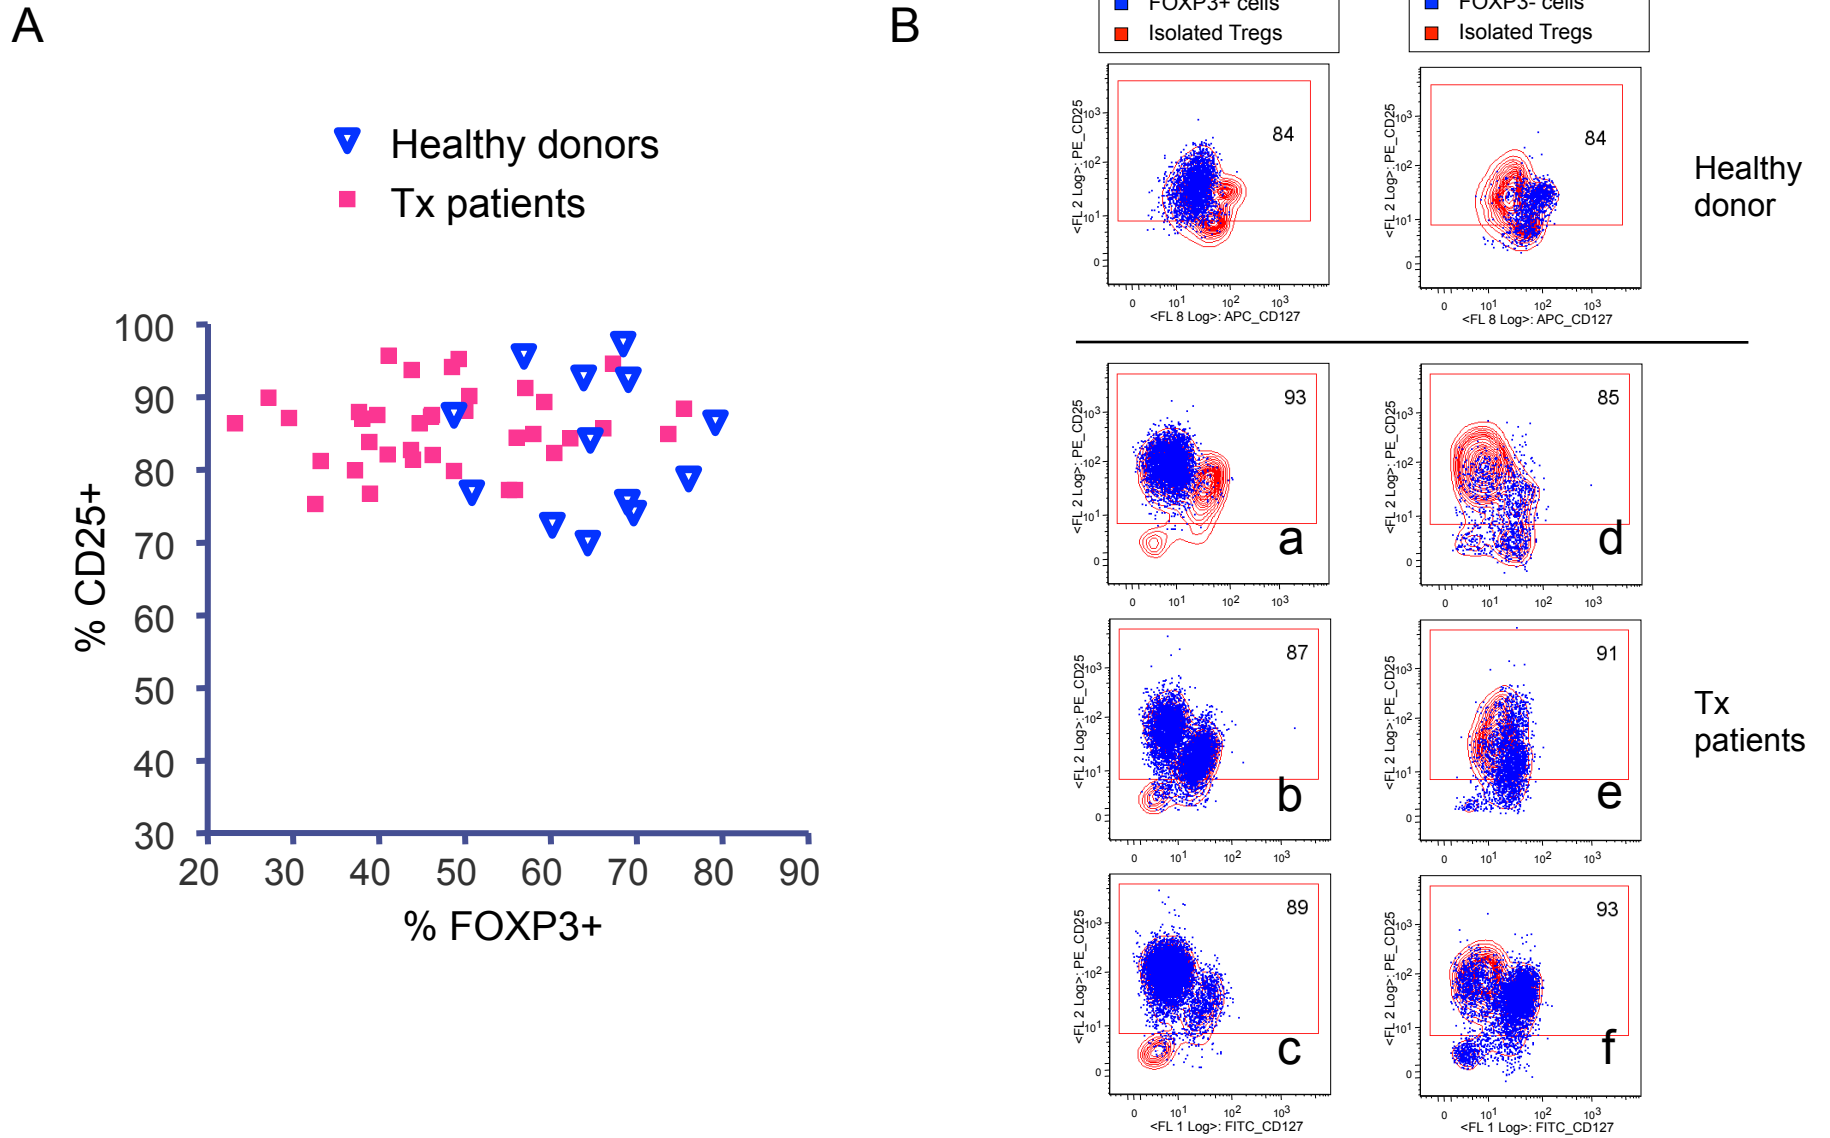

Figure S2

Lack of correlation between Treg expression of FOXP3 and their suppression of normal CD4 T cell proliferation

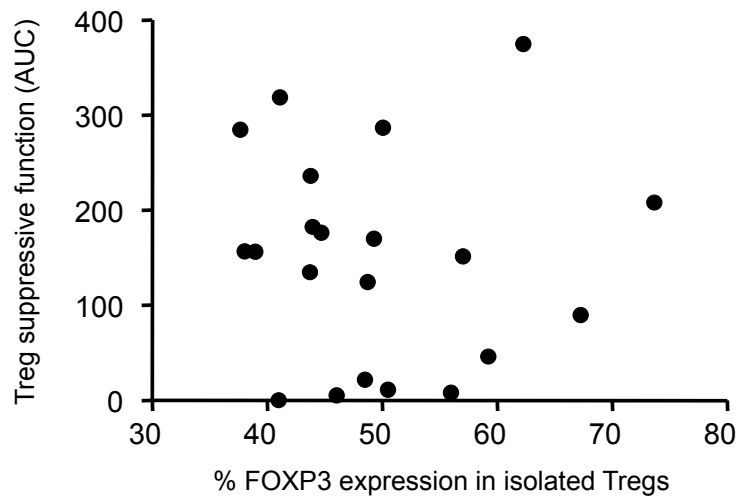

Lack of correlation between Treg expression of FOXP3 and their suppression of normal CD8 T cell proliferation

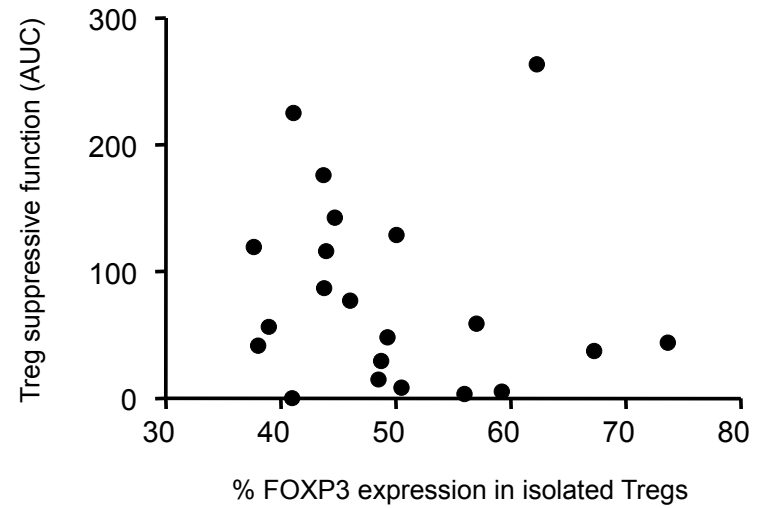

Figure S3

**A** Tregs with FOXP3/TSDR ratio >1 are more suppressive

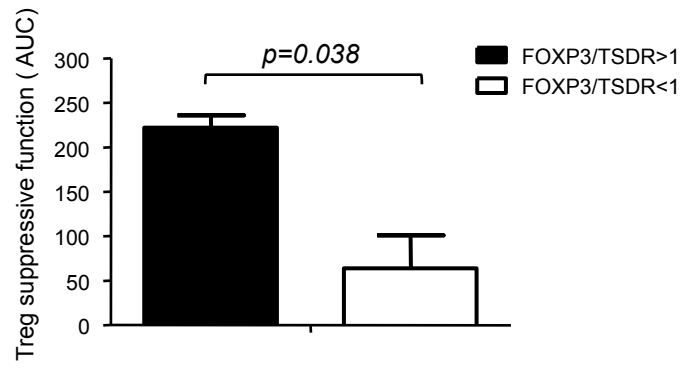

**B** Tregs with FOXP3/TSDR ratio >1 have higher CTLA4+ expression

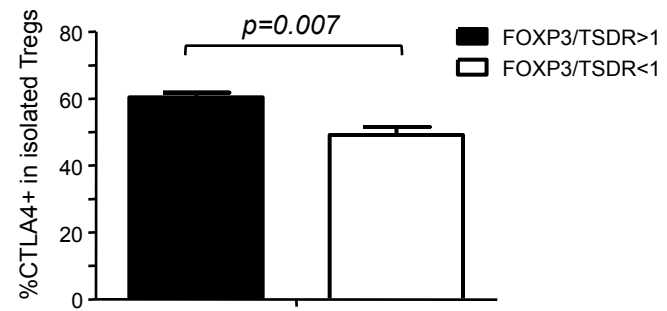

Figure S4
